# Supplementary material
Source: PubMed Central journal article supplement (PMC7810497)
Supplement: jci-131-144450-s038.pdf [file jci-131-144450-s038.pdf]

Supplementary figures

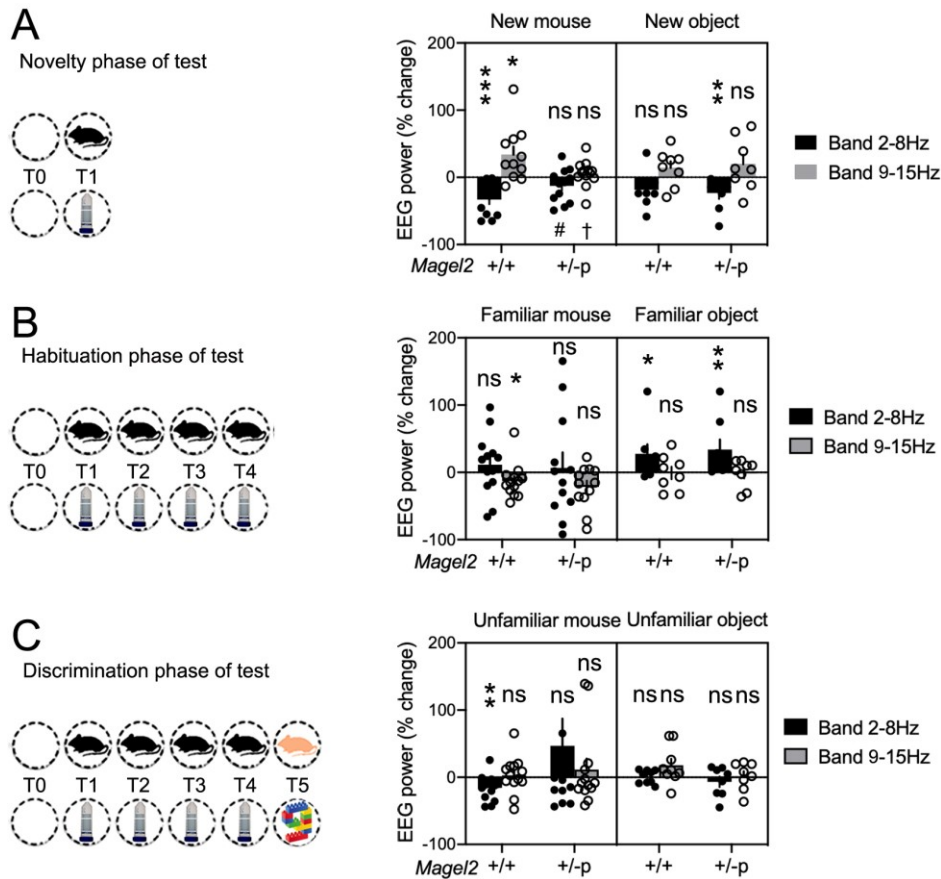

**Figure Suppl.1. *Magel2* deficiency impairs the changes of EEG power in the theta band during a new encounter with a mouse but not with an object**

(A) Change of EEG power in the theta band at T1 during the exploration of a new mouse or a new object (50-mL falcon tube). Data (means±SEM) expressed as % relative to T0 in n=12 *Magel2* +/+, 13 *Magel2* +/-p. Three-way ANOVA: effect of the theta band  $F_{1,72}=37.7$   $p<0.0001$ ; effect of genotype  $F_{1,72}=0.06$   $p=0.7$ ; effect of social versus non-social stimuli  $F_{1,72}=0.006$   $p=0.7$ ; effect of the theta band X genotype  $F_{1,72}=2.09$   $p=0.1$ ; effect of social versus non-social stimuli X theta band  $F_{1,72}=0.12$   $p=0.7$ ; interaction of 3 factors  $F_{1,72}=4.99$   $p=0.028$ . Wilcoxon test results as indicated comparing % change from baseline (set as 0) \* $p<0.05$ , \*\* $p<0.01$ , \*\*\* $p<0.001$ , ns= not significant. Effect of genotype by unpaired t-test in 2-8Hz band # $p=0.05$  and 9-15Hz band † $p=0.03$ .

(B) Change of EEG power in the theta band at T4 during the exploration of the same mouse or same object. Data (means±SEM) expressed as % relative to T1 in n=12 *Mage12* +/+, 13 *Mage12* +/-p. Three-way ANOVA: effect of the theta band  $F_{1,74}=8.4$   $p=0.0049$ ; effect of genotype  $F_{1,74}=0.03$   $p=0.8$ ; effect of social versus non-social stimuli  $F_{1,74}=3.5$   $p=0.06$ ; effect of the theta band X genotype  $F_{1,74}=0.07$   $p=0.7$ ; effect of social versus non-social stimuli X theta band  $F_{1,74}=0.08$   $p=0.7$ ; interaction of 3 factors  $F_{1,74}=0.004$   $p=0.9$ . Wilcoxon test results as indicated comparing % change from baseline (set as 0) \* $p<0.05$ , \*\* $p<0.01$ , \*\*\* $p<0.001$ .

(C) Change of EEG power in the theta band at T5 during the exploration of an familiar mouse or unfamiliar object (Lego). Data (means±SEM) expressed as % relative to T4 in n=12 *Mage12* +/+, 13 *Mage12* +/-p. Three-way ANOVA: effect of the theta band  $F_{1,78}=0.02$   $p=0.8$ ; effect of genotype  $F_{1,78}=0.69$   $p=0.4$ ; effect of social versus non-social stimuli  $F_{1,78}=0.3$   $p=0.57$ ; effect of the theta band X genotype  $F_{1,78}=1.23$   $p=0.26$ ; effect of social versus non-social stimuli X theta band  $F_{1,78}=0.54$   $p=0.46$ ; interaction of 3 factors  $F_{1,78}=0.65$   $p=0.4$ . Wilcoxon test results as indicated comparing % change from baseline (set as 0) \* $p<0.05$ , \*\* $p<0.01$ , \*\*\* $p<0.001$ .

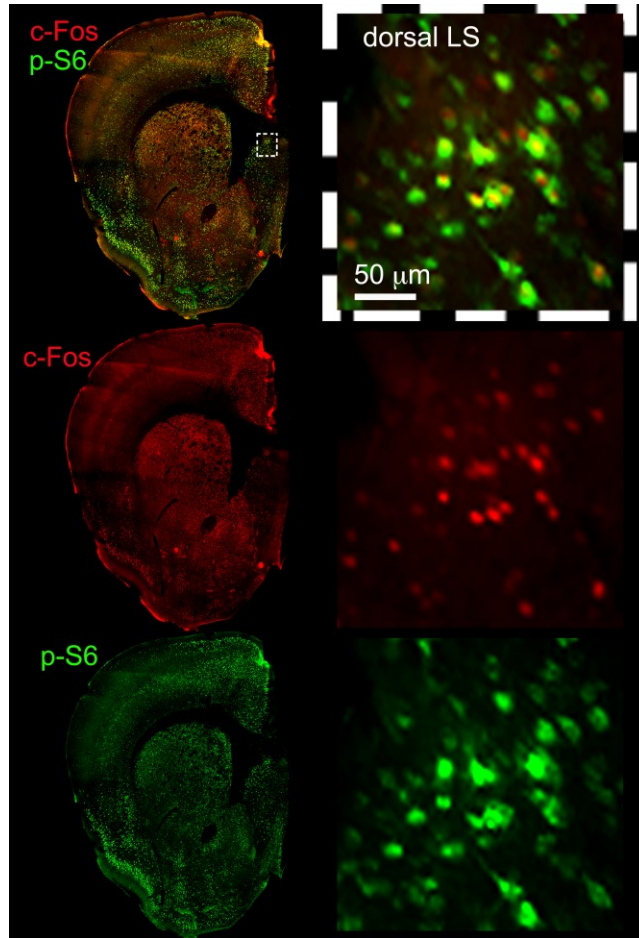

**Figure Suppl.2. Co-expression of c-Fos and phospho-S6 ribosomal protein in the mouse brain after the encounter with a new mouse.**  
Immunolabeling of cells with c-Fos and p-S6 antibodies in dorsal lateral septum 15 min after the end of the social novelty trial.

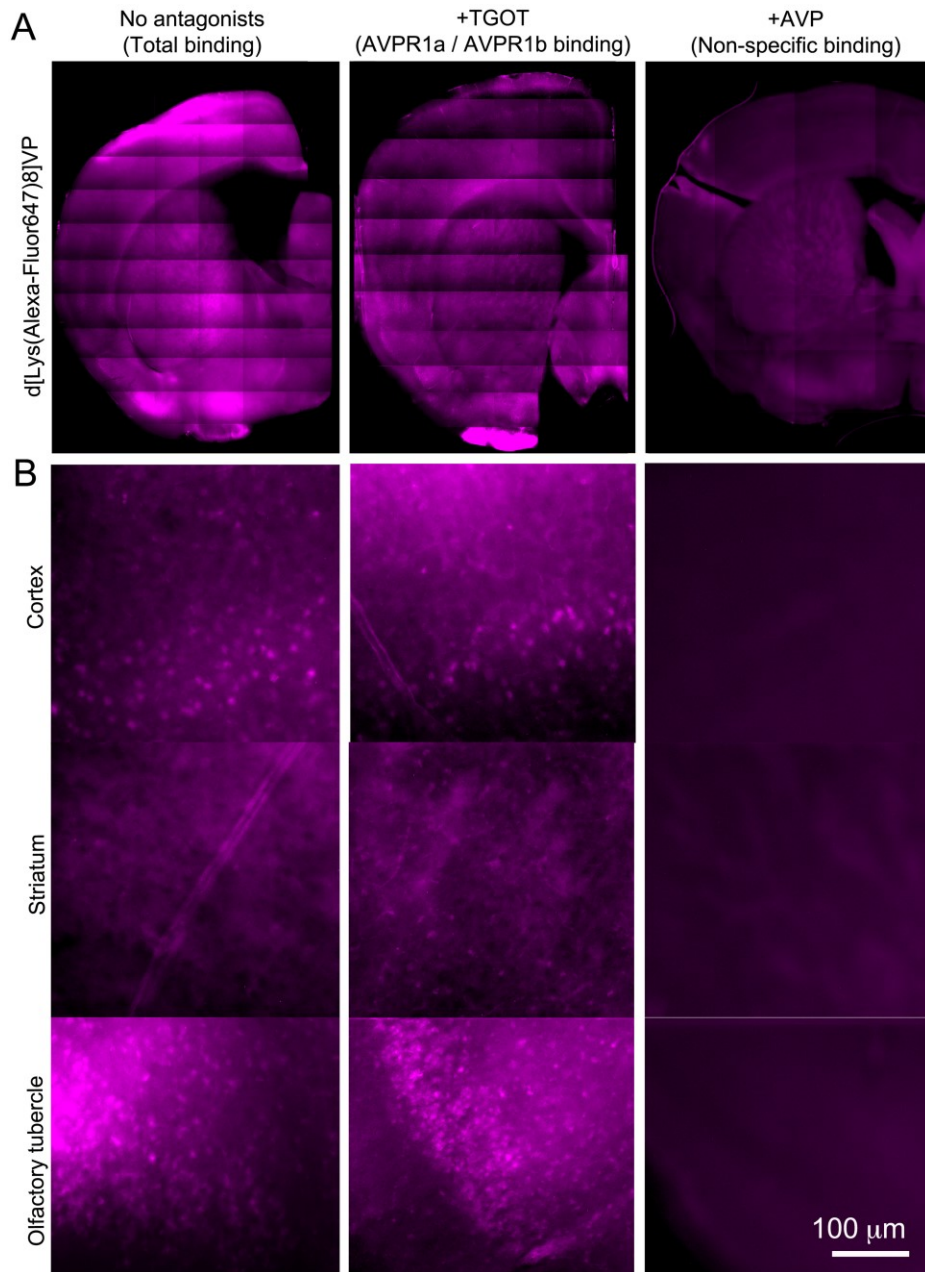

**Figure Suppl.3. Displacement of d[Lys(Alexa-Fluor647)8]VP binding ex vivo by TGOT and AVP.**

(A) Acute live brain slices incubated with 150 nM d[Lys(Alexa-Fluor647)8]VP (total binding) for 1hr at 12°C labeled cells in regions where AVPR1a, AVPR1b and OXTR are expressed (1). Slices were pre-incubated with 5μM TGOT (AVPR1a/ AVPR1b binding) or with 1μM AVP (non specific binding) for 1hr and further incubated with d[Lys(Alexa-Fluor647)8]VP for 1hr. Experiments are representative of 6-8 slices from 4 adult male mice. Cytological binding of

d[Lys(Alexa-Fluor647)8]VP +TGOT most likely results from AVPR1a binding sites at least in the lateral septum based on the affinity of d[Lys(Alexa-Fluor647)8]VP shown in the Table S1 and the enrichment of AVPR1a in the septum compared to the others receptors.

(B) Zoom in specific brain areas. Most labeling is in the cortex, olfactory tubercles, septum, hippocampus, hypothalamus and thalamus. The striatum is poorly labeled except for blood vessels. This pattern is similar to that observed with the autoradiographic labeling of V1a (see figure 3A).

## REFERENCE

1. Dumais KM & Veenema AH (2016) Vasopressin and oxytocin receptor systems in the brain: Sex differences and sex-specific regulation of social behavior. *Frontiers in Neuroendocrinology* 40:1-23.

## Supplementary Table

| d[Lys(Alexa647) <sup>8</sup> ]VP K <sub>i</sub> (nM) |       |      |   | dLysVP K <sub>i</sub> (nM) |      |   | TGOT (nM)  |      |
|------------------------------------------------------|-------|------|---|----------------------------|------|---|------------|------|
| Murine receptors                                     | Mean  | ±SEM | N | Mean                       | ±SEM | N | Mean       | Ref. |
| AVPR1a                                               | 765   | 182  | 7 | 5.9                        | 1.46 | 7 | >1000      | (2)  |
| AVPR1b                                               | 200   | 36   | 4 | 0.8                        | 0.18 | 4 | >1000<br>0 | (2)  |
| AVPR2                                                | 10429 | 745  | 4 | 4.8                        | 0.9  | 4 | n.d.       | n.d. |

**Table S1. Affinity of d[Lys(Alexa647)<sup>8</sup>]VP compared to dLysVP for murine AVP receptors**

Affinity of d[Lys(Alexa-Fluor-647)<sup>8</sup>]VP *in vitro* for the indicated mouse receptors: AVPR1b transfected in HEK293 cells, AVPR1a and AVPR2 are the endogenous from liver and kidney, respectively. K<sub>i</sub> values for d[Lys(Alexa-647)<sup>8</sup>]VP were calculated from dose response curves against 1 nM [<sup>3</sup>H]AVP. One-way ANOVA  $F(2,9)=168.2$   $p<0.0001$  post-hoc Tukey test comparing AVPR2 with AVPR1a  $p<0.0001$  and AVPR2 with AVPR1b  $p<0.0001$ . In contrast, dLysVP without the conjugation of Alexa-Fluor647 showed little selectivity among the murine AVPRs. One-way ANOVA  $F(2,12)=4.06$   $p=0.045$  post-hoc Tukey test comparing AVPR1a with AVPR1b  $p=0.038$ . Therefore, d[Lys(Alexa-647)<sup>8</sup>]VP has selective profile for the subtypes 1a and 1b amongst the murine AVPRs. The affinity of TGOT on the murine AVPR1a and AVPR1b are based on the supplemental reference 2.

## REFERENCE

2. Busnelli M, Bulgheroni E, Manning M, Kleinau G, & Chini B (2013) Selective and potent agonists and antagonists for investigating the role of mouse oxytocin receptors. *J Pharmacol Exp Ther* 346(2):318-327.

**Table S2: List of reagents**

| <b>Antibodies</b>                             |                                                                                        |                          |                 |                              |
|-----------------------------------------------|----------------------------------------------------------------------------------------|--------------------------|-----------------|------------------------------|
| <b>Immunogen</b>                              | <b>Details</b>                                                                         | <b>Source</b>            | <b>Use</b>      | <b>Manufacturer</b>          |
| Neurotensin (NT)                              | Cat# 418 005,<br>RRID:AB_2782980                                                       | Guinea pig<br>polyclonal | 1:100           | Synaptic systems             |
| Neurogranin<br>(NG)                           | Cat# ab5620,<br>RRID:AB_2171427                                                        | Mouse<br>monoclonal      | 1:100<br>0      | Merck                        |
| NeuN                                          | Cat# MAB377,<br>RRID:AB_2298767                                                        | Mouse<br>monoclonal      | 1:500           | Merck                        |
| GAD67                                         | Cat# MAB5406,<br>RRID:AB_2278725                                                       | Mouse<br>monoclonal      | 1:500           | Merck                        |
| Calretinin (CalR)                             | Cat# 6B3, RRID:AB_10000320                                                             | Mouse<br>monoclonal      | 1:100<br>0      | Swant                        |
| Calbindin D28k<br>(CalB)                      | Cat# CB38, RRID:AB_2721225                                                             | Mouse<br>monoclonal      | 1:500<br>0      | Swant                        |
| Somatostatin<br>(SST)                         | Cat# ab30788,<br>RRID:AB_778010                                                        | Rat polyclonal           | 1:50            | Abcam                        |
| GFP                                           | Cat# ab13970,<br>RRID:AB_300798                                                        | Chicken<br>polyclonal    | 1:300<br>0      | Abcam                        |
| c-Fos (9F6)                                   | Cat# 2250, RRID:AB_2247211                                                             | Rabbit<br>polyclonal     | 1:100<br>0      | Cell Signaling<br>Technology |
| c-Fos (E8)                                    | Cat# sc-166940,<br>RRID:AB_10609634                                                    | Mouse<br>monoclonal      | 1:100           | Santa Cruz<br>Laboratories   |
| Neurophysin I<br>(NPI)                        | Cat# PS-38, RRID:AB_2315026                                                            | Mouse<br>monoclonal      | 1:100<br>0      | H. Gainer at NIH,<br>USA     |
| Neurophysin II<br>(NPII)                      | Cat# PS41, RRID:AB_2313960                                                             | Mouse<br>monoclonal      | 1:500           | H. Gainer at NIH,<br>USA     |
| Fab anti mouse<br>IgG                         | Cat# BI 1013C                                                                          |                          | 1:500           | Abliance                     |
| Goat anti-guinea<br>pig Alexa-<br>Fluor488    | Cat#A-11073, RRID:<br>AB_2534117                                                       |                          | 1:200<br>0      | Thermo Fisher<br>Scientific  |
| Goat anti-rabbit<br>Alexa-<br>Fluor488/594/64 | Cat#A-11034/11037/21244;<br>RRID: AB_2576217, RRID:<br>AB_2534095, RRID:<br>AB_2535812 |                          | 1:200<br>0      | Thermo Fisher<br>Scientific  |
| Goat anti-mouse<br>Alexa-<br>Fluor488/594/64  | Cat#A-11029/11032/21236;<br>RRID: AB_2534088; RRID:<br>AB_2534091; RRID:<br>AB_141725  |                          | 1:200<br>0      | Thermo Fisher<br>Scientific  |
| <b>Drugs</b>                                  |                                                                                        |                          |                 |                              |
| <b>Compound</b>                               | <b>Effect</b>                                                                          | <b>Working</b>           | <b>comments</b> | <b>Manufacture</b>           |

| <b>name</b>                                 |                                         | <b>concentration</b>                                                                                   |                                                                                                                                | <b>r</b> |
|---------------------------------------------|-----------------------------------------|--------------------------------------------------------------------------------------------------------|--------------------------------------------------------------------------------------------------------------------------------|----------|
| Arg-vasopressin                             | Avpr agonist<br>CAS#113-79-1            | <i>Ex vivo</i> : $10^{-6}$ M<br><i>In vitro</i> : $10^{-6}$ M<br><i>In vivo</i> : $3 \times 10^{-4}$ M | Used in Whole cell recordings<br>Used as competitor in binding tests<br>Used in intraseptal injections                         | Merck    |
| TGOT                                        | Specific oxtr agonist<br>CAS# 60786-596 | <i>Ex vivo</i> : $10^{-7}$ M<br><i>In vivo</i> : $3 \times 10^{-6}$ M                                  | Used in Whole cell recordings<br>Used in intraseptal injections                                                                | Merck    |
| Atosiban                                    | Oxtr antagonist<br>CAS#90779-69-4       | <i>In vivo</i> : $10^{-8}$ M<br><i>Ex vivo</i> : $10^{-6}$ M                                           | Used in behaving mice<br>Used in Whole cell recordings                                                                         | Merck    |
| Manning Compound (MC)                       | AVPR antagonist<br>CAS#73168-24-8       | <i>In vivo</i> : $10^{-8}$ M<br><i>Ex vivo</i> : $10^{-6}$ M<br><i>Ex vivo</i> : $5 \times 10^{-6}$ M  | Used in intraseptal injections<br>Used in Whole cell recordings<br>Used in combination with d[L(Alexa-647)8]VP for selectivity | Bachem   |
| SR95531 (GABAzine)                          | GABA-A antagonist<br>CAS# 104104-50-9   | <i>Ex vivo</i> : $6 \times 10^{-6}$ M                                                                  | Used in Whole cell recordings                                                                                                  | Merck    |
| Tetrodotoxin (TTX)                          | CAS# 4368-28-9<br>T8024                 | <i>Ex vivo</i> : $3 \times 10^{-7}$ M                                                                  | Used in Whole cell recordings                                                                                                  | Merck    |
| 6-Cyano-7-nitroquinoxaline-2,3-dione (CNQX) | CAS# 115066-14-3<br>FG-9065             | <i>Ex vivo</i> : $10^{-6}$ M                                                                           | Used in Whole cell recordings                                                                                                  | Merck    |

#### Other compounds

|                          |                            |                                                                                                                           |                                                                                           |                 |
|--------------------------|----------------------------|---------------------------------------------------------------------------------------------------------------------------|-------------------------------------------------------------------------------------------|-----------------|
| Alexa-594-cadaverine     | Cell tracer<br>Cat# A30678 | <i>Ex vivo</i> : $5 \times 10^{-5}$ M<br><i>In vivo</i> : $5 \times 10^{-5}$ M                                            | Used to label patched cells<br>Used in vivo to visualize the diffusion area in the septum | Life Technology |
| d[L(Alexa-Fluor-647)8]VP | Fluorescent peptide        | <i>In vivo</i> : $5 \times 10^{-5}$ M<br><i>In vitro</i> : $3 \times 10^{-8}$ M<br><i>Ex vivo</i> : $15 \times 10^{-8}$ M | Used in combination with oxtr or avpr competitors for specificity                         | Homemade        |
| [ <sup>3</sup> H]-AVP    | AVPR agonist<br>CAT#NET80  | <i>In vitro</i> : $3 \times 10^{-9}$ M                                                                                    | Radioligand binding assays                                                                | Perkin-Elmer    |



|                                                              |                                     |                                           |                                                             |                            |
|--------------------------------------------------------------|-------------------------------------|-------------------------------------------|-------------------------------------------------------------|----------------------------|
| [ <sup>125</sup> I]-LVA                                      | 0<br>AVPR ligand<br>CAT#NEX310010   | <i>In vitro</i> : 1x10 <sup>-9</sup> M    | Radioligand binding assays                                  | Perkin-Elmer               |
| Desamino-Cys <sup>1</sup> ,<br>Lys <sup>8</sup> ]Vasopressin | CAS#16679-58-6                      | <i>In vitro</i> : 1x10 <sup>-6</sup> M    | Synthesis of d[L(Alexa-647)8]VP                             | Bachem                     |
| Paraformaldehyde                                             | Cat#P6148                           | 4 %                                       | Tissue fixation                                             | Merck                      |
| Alexa647<br>carboxylic acid<br>succinimidyl ester            | Fluorescent<br>tracer<br>CAT#A37573 | <i>In vitro</i> : 1.25x10 <sup>-6</sup> M | Synthesis of d[L(Alexa-647)8]VP                             | ThermoFisher<br>Scientific |
| pentobarbital                                                | Anesthetic<br>VetCode<br>QN51AA01   | <i>In vivo</i> : 50 mg/kg                 | Intraperitoneal injection                                   | Ceva Santé<br>Animale      |
| xylazine                                                     | anesthetic<br>VetCode<br>QN05CM92   | <i>In vivo</i> : 1.3 g/kg                 | Use in combination with ketamine. Intraperitoneal injection | Ceva Santé<br>Animale      |
| Ketamine                                                     | anesthetic<br>VetCode<br>QN01AX03   | <i>In vivo</i> : 6.6 g/kg                 | Use in combination with xylazine. Intraperitoneal injection | Ceva Santé<br>Animale      |

#### Virus

| Virus name                     | Concentration                 | Volume injected   | Manufacturer       |
|--------------------------------|-------------------------------|-------------------|--------------------|
| EF1a::DIO-ChR2-eYFP;WPRES::hGH | 2x10 <sup>11</sup> viruses/mL | 500 nL/hemisphere | U Penn Lot #CS0384 |

#### Reagents

| Name                                                   | Comment                                      | Manufacturer            |
|--------------------------------------------------------|----------------------------------------------|-------------------------|
| Lipofectamine CAT# 11668019                            | Transfection of cells                        | Life Technology         |
| Fluoromount CAT# 00-4958-02                            | Preservation of fluorescence mounting medium | ThermoFisher Scientific |
| HEK293T cells (CRL-3216)                               | Do not express endogenous OXTR and AVPR      | ATCC repository, USA    |
| DMEM CAT# 11960044                                     | Cell culture                                 | Life Technology         |
| Fetal bovine serum CAT#A31605                          | Cell culture                                 | Life Technology         |
| OPTIMEM CAT#31985062                                   | Transfection of cells                        | Life Technology         |
| Dental cement CAT#203097                               | surgery                                      | Paladur, Henry Schein   |
| Mandrin double pas de projection CAT#C235DCS-5/3/0     | cannula                                      | Phymed                  |
| Small dust cap CAT# 303DC/1                            | cannula                                      | Phymed                  |
| Canule interne double projection 1mm CAT# C235IS-5/3/1 |                                              |                         |
| Guide canule double 26G CAT# C235GS-5-0,8/3 0.8mm 3mm  | cannula                                      | Phymed                  |

|                                                                                                |                                                   |                                            |
|------------------------------------------------------------------------------------------------|---------------------------------------------------|--------------------------------------------|
| Branching Fiberoptic Patchcord<br>CAT# BFP(2)_200/220/900-<br>0.53_1m_FCM-GS0                  | patchcord                                         | Doric lenses                               |
| Dual fiber optic cannula with<br>Guiding Socket CAT#<br>DFC_200/245-<br>0.53_3.5mm_GS0.8_FLT   | 0.53 NA                                           | Doric lenses                               |
| Standard 6-pin headmount 8231-SM<br>PREAMPLIFIERS FOR MICE -<br>3-CHANNEL SYSTEM 8202-<br>DSE3 | EEG electrodes<br>Preamplifier for EEG recordings | Pinnacle Technology<br>Pinnacle Technology |
| 6-pin Mouse Commutator/Swivel<br>8204                                                          | Commutator for EEG recordings                     | Pinnacle Technology                        |
| 3-Channel Analog Adapter 8242-K                                                                | ANALOG ADAPTERS for EEG<br>recordings             | Pinnacle Technology                        |
| Data acquisition system sampling<br>200-2000Hz                                                 | 1Hz, gain 5000-10000V/V                           | Pinnacle Technology                        |
| SYNCHRONIZED VIDEO<br>SYSTEM                                                                   | 30 frames per second                              | Pinnacle Technology                        |
| Cage for mice 8228                                                                             | 25.4 x 20.3 cm                                    | Pinnacle Technology                        |

#### Mice

| Name               | background   | Details                                      | Source                      |
|--------------------|--------------|----------------------------------------------|-----------------------------|
| Avptm1.1(cre)Hze/. | Avp-CRE      | C57BL6J Cat#023530; RRID:<br>IMSR_JAX:023530 | Jackson<br>laboratories     |
| Magel2tm1.1Mus/J   | Magel2K<br>O | C57BL6J MGI:4849506                          | F. Muscatelli,<br>INMED, Fr |
| C57BL6J            |              | C57BL6J Cat#000664; RRID:<br>IMSR_JAX:000664 | Charles River               |

#### Genotyping Primers

| Gene                        | Sequence                                                      |
|-----------------------------|---------------------------------------------------------------|
| Cre-recombinase<br>allele   | 5'-TCTGTCCGTTTGCCGGTCGT-3' and 5'-<br>AGACCGCGCGCCTGAAGATA-3' |
| AVP-cre WT allele           | 5'-GAGTCCGTGGATTCTGCCAA-3' and 5'-<br>CTATGCACGACTTCGGGTGT-3' |
| <i>Magel2</i> - (KO) allele | 5'-TGCTTCCTGCCCTTCAGTTAC-3' and 5'-GCTTATCGATACCGTCGACCTC-3'  |
| <i>Magel2</i> + (WT) allele | 5'-GTCACACACCCATTTCGACCT-3' and 5'-TACCCTCGGGAGCAGTAGAC-3'    |

#### Softwares and Algorithms

| Name                                               | Source                                                                                              |
|----------------------------------------------------|-----------------------------------------------------------------------------------------------------|
| Graphpad prism 8.0 SCR_002798                      | <a href="http://graphpad.com">http://graphpad.com</a>                                               |
| Adobe Creative Suite 6 (Photoshop,<br>Illustrator) | <a href="https://www.adobe.com/de/products/cs6.html">https://www.adobe.com/de/products/cs6.html</a> |

---

|                                 |                                                                                                                                                                                                                       |
|---------------------------------|-----------------------------------------------------------------------------------------------------------------------------------------------------------------------------------------------------------------------|
| Fiji Image J SCR_003070         | <a href="http://imagej.net/Fiji">http://imagej.net/Fiji</a>                                                                                                                                                           |
| Sirenia acquisition and seizure | <a href="https://www.pinnaclet.com/software.html">https://www.pinnaclet.com/software.html</a>                                                                                                                         |
| NeuroScore™ CNS Software        | <a href="https://www.datasci.com/products/software/neuroscore">https://www.datasci.com/products/software/neuroscore</a>                                                                                               |
| pClamp software                 | <a href="https://www.moleculardevices.com/products/axon-patch-clamp-system/acquisition-and-analysis-software">https://www.moleculardevices.com/products/axon-patch-clamp-system/acquisition-and-analysis-software</a> |

---

**Table S3: Statistical analyses**

| <b>Fi g.</b> | <b>Sample size</b>                                                        | <b>Effect size (Cohen's d)</b>                                                                                                                                                                                                                                                                                                                                                                                 | <b>Type of test</b>                  | <b>Statistical data</b>                                                                                                                                                                                                                     |
|--------------|---------------------------------------------------------------------------|----------------------------------------------------------------------------------------------------------------------------------------------------------------------------------------------------------------------------------------------------------------------------------------------------------------------------------------------------------------------------------------------------------------|--------------------------------------|---------------------------------------------------------------------------------------------------------------------------------------------------------------------------------------------------------------------------------------------|
| 1B           | Mice: 12 +/+, 13 +/-p                                                     | d NOVELTY =0.88<br>d HABITUATION =0.49<br>d DISCRIMINATION =1.96                                                                                                                                                                                                                                                                                                                                               | 1-way ANOVA                          | $F_{\text{TRIALS}} (5,125)=16.47, p<0.0001^*$                                                                                                                                                                                               |
| 1C           | Mice: 14 +/+, 16 +/-p                                                     | d GENOTYPE =0.47<br>d TRIALS =0.55<br>d GENOTYPE X TRIALS =0.46                                                                                                                                                                                                                                                                                                                                                | 2-way ANOVA RM                       | $F_{\text{GENOTYPE}} (1,28)=2.55, p=0.001^*$<br>$F_{\text{SOCIAL TRIALS}} (2,56)=6.82, p=0.002^*$<br>$F_{\text{GENOTYPE X SOCIAL TRIALS}} (2,56)=4.69, p=0.01^*$                                                                            |
| 1D           | Mice: 8 +/+, 8 +/-p                                                       | d NOVELTY =0.013<br>d HABITUATION =0.17<br>d DISCRIMINATION =1.15                                                                                                                                                                                                                                                                                                                                              | 1-way ANOVA                          | $F_{\text{TRIALS}} (5,125)=5.69, p<0.0001^*$                                                                                                                                                                                                |
| 1E           | Mice: 9 +/+, 9 +/-p                                                       | d GENOTYPE =0.17<br>d TRIALS =1.47<br>d GENOTYPE X TRIALS =0.087                                                                                                                                                                                                                                                                                                                                               | 2-way ANOVA RM                       | $F_{\text{GENOTYPE}} (1,16)=0.4, p=0.5$<br>$F_{\text{OBJECT TRIALS}} (2,32)=28.33, p<0.0001$<br>$F_{\text{GENOTYPE X OBJECT TRIALS}} (2,32)=0.09, p=0.9$                                                                                    |
| 2C           | +/+ mice: 5 T0, 5 T1, 4 T4, 4 T5<br><br>+/-p mice: 7 T0, 5 T1, 4 T4, 9 T5 | d NOVELTY MS =2.4<br>d NOVELTY LSD =4.3<br>d NOVELTY LSI=2.88<br>d NOVELTY LSV =3.6<br>d HABITUATION MS =5.4<br>d HABITUATION LSD =2.17<br>d HABITUATION LSI =2.8<br>d HABITUATION LSV =2.84<br>d DISCRIMINATION MS =3.73<br>d DISCRIMINATION LSD =2.0<br>d DISCRIMINATION LSI =2.19<br>d DISCRIMINATION LSV =3.66<br><br>d NOVELTY MS =1.38<br>d NOVELTY LSD =0.4<br>d NOVELTY LSI=0.2<br>d NOVELTY LSV =0.83 | 2-way ANOVA RM<br><br>2-way ANOVA RM | $F_{\text{SOCIAL TRIALS in +/+}} (3,56)=31.7, p<0.0001^*$<br>$F_{\text{SEPTAL REGIONS in +/+}} (3,56)=2.95, p=0.$<br><br>$F_{\text{SOCIAL TRIALS in +/-p}} (3,88)=6.87, p=0.0003^*$<br>$F_{\text{SEPTAL REGIONS in +/-p}} (3,56)=2.39, p=0$ |

|    |                                                                                             |                                                                                                                                                                                                        |                   |                                                                                                                                                                                                                                                                                                                                                                                                            |
|----|---------------------------------------------------------------------------------------------|--------------------------------------------------------------------------------------------------------------------------------------------------------------------------------------------------------|-------------------|------------------------------------------------------------------------------------------------------------------------------------------------------------------------------------------------------------------------------------------------------------------------------------------------------------------------------------------------------------------------------------------------------------|
|    |                                                                                             | d HABITUATION MS<br>=1.56                                                                                                                                                                              |                   |                                                                                                                                                                                                                                                                                                                                                                                                            |
|    |                                                                                             | d HABITUATION LSD =0.3                                                                                                                                                                                 |                   |                                                                                                                                                                                                                                                                                                                                                                                                            |
|    |                                                                                             | d HABITUATION LSI<br>=0.16                                                                                                                                                                             |                   |                                                                                                                                                                                                                                                                                                                                                                                                            |
|    |                                                                                             | d HABITUATION LSV<br>=0.59                                                                                                                                                                             |                   |                                                                                                                                                                                                                                                                                                                                                                                                            |
|    |                                                                                             | d DISCRIMINATION MS<br>=1.55                                                                                                                                                                           |                   |                                                                                                                                                                                                                                                                                                                                                                                                            |
|    |                                                                                             | d DISCRIMINATION LSD<br>=0.52                                                                                                                                                                          |                   |                                                                                                                                                                                                                                                                                                                                                                                                            |
|    |                                                                                             | d DISCRIMINATION LSI<br>=0.5                                                                                                                                                                           |                   |                                                                                                                                                                                                                                                                                                                                                                                                            |
|    |                                                                                             | d DISCRIMINATION LSV<br>=1.19                                                                                                                                                                          |                   |                                                                                                                                                                                                                                                                                                                                                                                                            |
| 2D | +/+ mice: 7 T0, 6 T1, 7 T4, 7 T5, 5 T1+2hrs<br>+/-p mice: 7 T0, 5 T1, 6 T4, 6 T5, 5 T1+2hrs | d TRIALS =1.11<br>d GENORYPE =0.97<br>d SEPTAL REGIONS X TRIALS =0.262                                                                                                                                 | 2-way ANOVA       | $F_{\text{GENOTYPE}} (1,52)=14.05, p=0.0004^*$<br>$F_{\text{TRIALS}} (4,52)=18.36, p<0.0001^*$<br>$F_{\text{GENOTYPE X TRIALS}} (4,52)=1.0, p=0.4$                                                                                                                                                                                                                                                         |
| 2E | Mice: 5 NaCl, 5 AVP, 4 TGOT                                                                 | d INJECTIONS =2.89                                                                                                                                                                                     | Kruskal Wallis    | $p=0.0012^*$                                                                                                                                                                                                                                                                                                                                                                                               |
| 3A | Mice: 8 +/+, 7 +/-p                                                                         | d GENOTYPE =0.8<br>d SEPTAL REGIONS =0.2<br>d GENOTYPE X SEPTAL REGIONS =0.26                                                                                                                          | 2-way ANOVA       | $F_{\text{GENOTYPE}} (1,26)=2.08, p=0.16$<br>$F_{\text{SEPTAL REGIONS}} (1,26)=0.13, p=0.71$<br>$F_{\text{SEPTAL REGIONS X GENOTYPE}} (1,26)=0.2, p=0.64$                                                                                                                                                                                                                                                  |
| 3D | Mice: 5 +/+, 5 +/-p                                                                         | d CELL MARKER =1.6<br>d dLVP647 =1.85<br>d GENORYPE =0.356<br>d CELL MARKER X dLVP647 =1.93<br>d CELL MARKER X GENOTYPE =0.6<br>d dLVP647 X GENOTYPE =0.41<br>d GENOTYPE X CELL MARKER X dLVP647 =0.68 | 3-way ANOVA       | $F_{\text{CELL MARKER}} (2,59)=37.27, p<0.0001$<br>$F_{\text{dLVP647}} (1,59)=49.85, p<0.0001^*$<br>$F_{\text{GENOTYPE}} (1,59)=1.83, p<0.18$<br>$F_{\text{CELL MARKER X dLVP647}} (2,59)=54.01, p<0.0001^*$<br>$F_{\text{CELL MARKER X GENOTYPE}} (2,59)=5.26, p=0.0079^*$<br>$F_{\text{GENOTYPE X dLVP647}} (2,59)=2.5, p=0.11$<br>$F_{\text{GENOTYPE X dLVP647 X CELL MARKER}} (2,59)=5.35, p=0.0073^*$ |
| 4B | Cells +/+: 27 excited, 33 insensitive<br>Cells +/-p: 14 excited, 14 insensitive             | d TIME =0.71<br>d AVP =0.95<br>d GENORYPE =0.256<br>d TIME X AVP =0.682<br>d TIME X GENOTYPE                                                                                                           | 3-way ANOVA<br>RM | $F_{\text{TIME}} (30,2259)= 9.5, p<0.0001^*$<br>$F_{\text{AVP}} (1,76)=16.89, p<0.0001^*$<br>$F_{\text{GENOTYPE}} (1,76)=1.22, p=0.27$<br>$F_{\text{TIME X AVP}} (30,2259)=8.67, p<0.0001$<br>$F_{\text{TIME X GENOTYPE}} (30,2259)=1.39, p=0$                                                                                                                                                             |

|    |                                                                                     |                                                                                                                                                                                                                                      |                |                                                                                                                                                                                                                                                                                                                                                     |
|----|-------------------------------------------------------------------------------------|--------------------------------------------------------------------------------------------------------------------------------------------------------------------------------------------------------------------------------------|----------------|-----------------------------------------------------------------------------------------------------------------------------------------------------------------------------------------------------------------------------------------------------------------------------------------------------------------------------------------------------|
|    |                                                                                     | =0.27<br>$d_{\text{GENOTYPE X AVP}}=0.188$<br>$d_{\text{GENOTYPE X AVP X TIME}}=0.23$                                                                                                                                                |                | $F_{\text{GENOTYPE X AVP}}(1,76)=0.66, p=0.41$<br>$F_{\text{TIME X AVP X GENOTYPE}}(30,2259)=1.04, p=0.4$                                                                                                                                                                                                                                           |
| 4C | Cells +/+ : 31 inhibited, 33 insensitive<br>Cells +/-p: 4 inhibited, 14 insensitive | $d_{\text{TIME}}=0.43$<br>$d_{\text{AVP}}=0.59$<br>$d_{\text{GENOTYPE}}=0.209$<br>$d_{\text{TIME X AVP}}=0.47$<br>$d_{\text{TIME X GENOTYPE}}=0.21$<br>$d_{\text{GENOTYPE X AVP}}=0.093$<br>$d_{\text{GENOTYPE X AVP X TIME}}=0.185$ | 3-way ANOVA RM | $F_{\text{TIME}}(30,2077)=2.55, p<0.0001^*$<br>$F_{\text{AVP}}(1,71)=4.9, p=0.029^*$<br>$F_{\text{GENOTYPE}}(1,71)=0.6, p=0.43$<br>$F_{\text{TIME X AVP}}(30,2077)=3.045, p<0.000$<br>$F_{\text{TIME X GENOTYPE}}(30,2077)=0.65, p=0$<br>$F_{\text{GENOTYPE X AVP}}(1,71)=0.13, p=0.71$<br>$F_{\text{TIME X AVP X GENOTYPE}}(30,2077)=0.47, p=0.99$ |
| 4D | Loose patch: 32 +/+, 26 +/-p cells<br>Whole cell: 103 +/+, 45 +/-p cells            | $d_{\text{LOOSE PATCH}}=0.99$<br>$d_{\text{WHOLE CELL}}=0.62$                                                                                                                                                                        | Chi-square     | $X^2(2)=11.47, p=0.003^*$<br>$X^2(2)=13.22, p=0.0013^*$                                                                                                                                                                                                                                                                                             |
| 5B | Mice: 13 NaCl, 10 AVP                                                               | $d_{\text{FREQUENCY}}=0.38$<br>$d_{\text{AVP 10 MIN}}=1.255$<br>$d_{\text{AVP 10 MIN X FREQUENCY}}=0.449$<br>$d_{\text{FREQUENCY}}=0.27$<br>$d_{\text{AVP 60 MIN}}=1.73$<br>$d_{\text{AVP 60 MIN X FREQUENCY}}=0.57$                 | 2-way ANOVA RM | $F_{\text{FREQUENCY}}(25,546)=0.77, p=0.78$<br>$F_{\text{AVP 10 MIN}}(1,546)=8.13, p=0.0045^*$<br>$F_{\text{FREQUENCY X AVP 10 MIN}}(25,546)=1.04, p=0.41$<br>$F_{\text{FREQUENCY}}(25,650)=0.38, p=0.99$<br>$F_{\text{AVP 60 MIN}}(1,650)=15.59, p<0.0001^*$<br>$F_{\text{FREQUENCY X AVP 60 MIN}}(25,650)=1.73, p=0.017^*$                        |
| 5C | +/-p mice: 14 NaCl, 16 AVP                                                          | $d_{\text{TRIALS}}=1.6$<br>$d_{\text{AVP}}=0.021$<br>$d_{\text{AVP X TRIALS}}=0.573$                                                                                                                                                 | 2-way ANOVA RM | $F_{\text{TRIALS}}(2,42)=17.99, p<0.0001^*$<br>$F_{\text{AVP}}(1,21)=0.003, p=0.8$<br>$F_{\text{AVP X TRIALS}}(2,42)=2.29, p=0.11$                                                                                                                                                                                                                  |
| 5D | +/-p mice: 14 NaCl, 9 AVP                                                           | $d_{\text{FREQUENCY T1}}=0.75$<br>$d_{\text{AVP}}=0.485$<br>$d_{\text{AVP X FREQUENCY T1}}=0.505$<br>$d_{\text{FREQUENCY T5}}=0.39$<br>$d_{\text{AVP}}=0.589$<br>$d_{\text{AVP X FREQUENCY T5}}=0.59$                                | 2-way ANOVA RM | $F_{\text{FREQUENCY T1}}(23,504)=2.84, p<0.000$<br>$F_{\text{AVP}}(1,504)=1.176, p=0.27$<br>$F_{\text{AVP X FREQUENCY T1}}(23,480)=1.275, p=0.17$<br>$F_{\text{FREQUENCY T5}}(23,480)=0.76, p=0.77$<br>$F_{\text{AVP}}(1,480)=1.738, p=0.18$<br>$F_{\text{AVP X FREQUENCY T5}}(23,480)=1.74, p=0.016^*$                                             |
| 5E | +/+ mice: 15 NaCl, 11 MC                                                            | $d_{\text{TRIALS}}=1.37$<br>$d_{\text{MC}}=0.648$                                                                                                                                                                                    | 2-way ANOVA    | $F_{\text{TRIALS}}(2,48)=11.12, p=0.0001^*$<br>$F_{\text{MC}}(1,24)=2.46, p=0.12$                                                                                                                                                                                                                                                                   |

|    |                                   |                                                                                                                                                                                                                                          |                    |                                                                                                                                                                                                                                                                                                       |
|----|-----------------------------------|------------------------------------------------------------------------------------------------------------------------------------------------------------------------------------------------------------------------------------------|--------------------|-------------------------------------------------------------------------------------------------------------------------------------------------------------------------------------------------------------------------------------------------------------------------------------------------------|
|    |                                   | $d_{MC \times TRIALS} = 0.56$                                                                                                                                                                                                            | RM                 | $F_{MC \times TRIALS} (2,48) = 1.83, p = 0.17$                                                                                                                                                                                                                                                        |
| 5F | +/+ mice: 17 NaCl, 11 MC          | $d_{FREQUENCY T1} = 0.676$<br>$d_{MC} = 0.644$<br>$d_{MC \times FREQUENCY T1} = 0.298$<br>$d_{FREQUENCY T5} = 0.32$<br>$d_{MC} = 2.24$<br>$d_{MC \times FREQUENCY T5} = 0.565$                                                           | 2-way ANOVA<br>RM  | $F_{FREQUENCY T1} (25,650) = 2.833, p < 0.0001^*$<br>$F_{MC} (1,650) = 2.56, p = 0.1$<br>$F_{MC \times FREQUENCY T1} (25,650) = 0.55, p = 0.96$<br>$F_{FREQUENCY T5} (25,676) = 0.63, p = 0.9$<br>$F_{MC} (1,676) = 31.38, p < 0.0001^*$<br>$F_{MC \times FREQUENCY T5} (25,676) = 1.98, p = 0.003^*$ |
| 6B | Mice: 5 +/+, 5 +/-p               |                                                                                                                                                                                                                                          | Kolmogorov-Smirnov | $p < 0.0001^*$                                                                                                                                                                                                                                                                                        |
| 6D | +/+ mice: 8 T0, 8 T1, 12 T4, 7 T5 | $d_{NOVELTY PVN} = 2.41$<br>$d_{NOVELTY LH} = NA$<br>$d_{NOVELTY SON} = 1.37$<br>$d_{NOVELTY BNST} = NA$<br>$d_{HABITUATION PVN} = 1.17$<br>$d_{HABITUATION LH} = 0.33$<br>$d_{HABITUATION SON} = 0.83$<br>$d_{HABITUATION BNST} = 0.44$ | 2-way ANOVA        | $F_{SOCIAL TRIALS} (3,96) = 4.34, p = 0.006^*$<br>$F_{SEPTAL REGIONS \text{ in } +/+} (3,96) = 23.76, p < 0.0001^*$<br>$F_{SEPTAL REGIONS \text{ in } +/+ \times SOCIAL TRIALS} (3,96) = 4.36, p < 0.0001^*$                                                                                          |
|    | +/-p mice: 9 T0, 8 T1, 5 T4, 5 T5 | $d_{DISCRIMINATION PVN} = 5.3$<br>$d_{DISCRIMINATION LH} = NA$<br>$d_{DISCRIMINATION SON} = NA$<br>$d_{DISCRIMINATION BNST} = 0.9$                                                                                                       | 2-way ANOVA        | $F_{SOCIAL TRIALS} (3,75) = 2.53, p = 0.06$<br>$F_{SEPTAL REGIONS \text{ in } +/-p} (3,75) = 1.76, p = 0.19$<br>$F_{SEPTAL REGIONS \text{ in } +/-p \times SOCIAL TRIALS} (3,75) = 1.173, p = 0.32$                                                                                                   |
|    |                                   | $d_{NOVELTY PVN} = 0.6$<br>$d_{NOVELTY LH} = 0.07$<br>$d_{NOVELTY SON} = 0.24$<br>$d_{NOVELTY BNST} = 0.86$<br>$d_{HABITUATION PVN} = 0.35$<br>$d_{HABITUATION LH} = 0.5$<br>$d_{HABITUATION SON} = 0.6$<br>$d_{HABITUATION BNST} = 0.7$ |                    |                                                                                                                                                                                                                                                                                                       |

|                |                                                                                |                                                                                                                                                |                   |                                                                                                                                                                                                                                                                                                      |
|----------------|--------------------------------------------------------------------------------|------------------------------------------------------------------------------------------------------------------------------------------------|-------------------|------------------------------------------------------------------------------------------------------------------------------------------------------------------------------------------------------------------------------------------------------------------------------------------------------|
|                |                                                                                | d DISCRIMINATION PVN<br>=0.1                                                                                                                   |                   |                                                                                                                                                                                                                                                                                                      |
|                |                                                                                | d DISCRIMINATION LH<br>=0.5                                                                                                                    |                   |                                                                                                                                                                                                                                                                                                      |
|                |                                                                                | d DISCRIMINATION SON<br>=0.44                                                                                                                  |                   |                                                                                                                                                                                                                                                                                                      |
|                |                                                                                | d DISCRIMINATION BNST<br>=0.7                                                                                                                  |                   |                                                                                                                                                                                                                                                                                                      |
| 7C             | BNST: 6 no light, 6 light stimulation<br>PVN: 9 no light, 11 light stimulation | d TRIALS =2.61<br>d CHR2 in BNST =0.268<br>d CHR2 in BNST X TRIALS =1.2<br>d TRIALS =1.4<br>d CHR2 in PVN =0.79<br>d CHR2 in PVN X TRIALS =0.8 | 2-way ANOVA<br>RM | $F_{\text{TRIALS}}(2,10)=17.11, p=0.0006^*$<br>$F_{\text{CHR2 in BNST}}(1,5)=0.18, p=0.6$<br>$F_{\text{TRIALS X CHR2 in BNST}}(2,10)=3.61, p=0$<br>$F_{\text{TRIALS}}(2,26)=8.84, p=0.0012^*$<br>$F_{\text{CHR2 in PVN}}(1,13)=2.8, p=0.11$<br>$F_{\text{TRIALS X CHR2 in PVN}}(2,8)=2.9, p=0.11$    |
| 7D             | BNST: 11 no light, 6 light stimulation                                         | d FREQUENCY T1 =0.275<br>d CHR2 =2.3<br>d CHR2 X FREQUENCY T1 =0.4<br>d FREQUENCY T5 =0.45<br>d CHR2 =0.054<br>d CHR2 X FREQUENCY T5 =0.711    | 2-way ANOVA<br>RM | $F_{\text{FREQUENCY T1}}(25,390)=0.26, p=0.99$<br>$F_{\text{CHR2}}(1,390)=18.27, p<0.0001^*$<br>$F_{\text{CHR2 X FREQUENCY T1}}(25,390)=0.6, p=$<br>$F_{\text{FREQUENCY T5}}(25,400)=0.7, p=0.84$<br>$F_{\text{CHR2}}(1,16)=0.01, p=0.8$<br>$F_{\text{CHR2 X FREQUENCY T5}}(25,400)=1.73, p=0.016^*$ |
| 7E             | BNST: 6 no light, 6 light stimulation<br>PVN: 6 no light. 6 light stimulation  | d BNST =1.44                                                                                                                                   | Kruskal Wallis    | $p=0.0117^*$                                                                                                                                                                                                                                                                                         |
| Ta<br>ble<br>1 | EPSC: 40 excited cells                                                         | d AVP =0.26<br>d TTX =0.76<br>d AVP X TTX =1.69<br>d CNQX =2.27<br>d AVP X CNQX =4.3                                                           | 1-way ANOVA       | $F_{\text{EPSC EXCITED CELLS}}(5,74)=10.52, p<0.0001^*$                                                                                                                                                                                                                                              |
|                | EPSC: 21 inhibited cells                                                       | d AVP =0.7<br>d TTX =0.03<br>d AVP X TTX =1.04<br>d CNQX =3.1<br>d AVP X CNQX =1.03                                                            | 1-way ANOVA       | $F_{\text{EPSC INHIBITED CELLS}}(5,36)=5.1, p=0.0012^*$                                                                                                                                                                                                                                              |
|                | IPSC: 26 excited cells                                                         | d AVP =1.19<br>d TTX =0.6<br>d AVP X TTX =3.7                                                                                                  | 1-way ANOVA       | $F_{\text{IPSC EXCITED CELLS}}(3,49)=8.97,$                                                                                                                                                                                                                                                          |



---

|                                  |                                                                                     |                |                                                                  |
|----------------------------------|-------------------------------------------------------------------------------------|----------------|------------------------------------------------------------------|
| IPSC: 13 inhibited cells         | $d_{AVP}=1.23$<br>$d_{TTX}=0.6$<br>$d_{AVP \times TTX}=6.9$                         | 1-way<br>ANOVA | $p<0.0001^*$                                                     |
| EPSC+IPSC: 52<br>excited cells   | $d_{AVP}=0.85$<br>$d_{TTX}=0.49$<br>$d_{GABAZINE}=0.45$<br>$d_{AVP + GABAZINE}=2.0$ | 1-way<br>ANOVA | $F_{IPSC \text{ INHIBITED CELLS } (3,22)}=5.1,$<br>$p=0.0077^*$  |
| EPSC+IPSC: 30<br>inhibited cells | $d_{AVP}=1.43$<br>$d_{TTX}=0.6$<br>$d_{GABAZINE}=0.56$<br>$d_{AVP + GABAZINE}=1.46$ | 1-way<br>ANOVA | $F_{IPSC \text{ EXCITED CELLS } (4,99)}=6.45,$<br>$p<0.0001^*$   |
|                                  |                                                                                     |                | $F_{IPSC \text{ INHIBITED CELLS } (4,55)}=8.33,$<br>$p<0.0001^*$ |

---
